# Supplementary material
Source: PubMed Central journal article supplement (PMC6885640)
Supplement: supp_RA119.011008_155741_1_supp_407738_pz0wyp.pdf [file supp_RA119.011008_155741_1_supp_407738_pz0wyp.pdf]

## SUPPORTING INFORMATION

Characterization of the internal translation initiation region in monoclonal antibodies expressed in  
*Escherichia coli*

Erik M. Leith, William B. O'Dell, Na Ke, Colleen McClung, Mehmet Berkmen, Christina Bergonzo,  
Robert G. Brinson, Zvi Kelman

Supporting Experimental Procedures

Supporting Figure S1

Supporting Figure S2

Supporting Figure S3

Supporting Figure S4

Supporting Figure S5

## Supporting Experimental Procedures

### Normalization of fluorescence from plate reader assay

Cell density-normalized GFP fluorescence data (arbitrary units) for each sample were obtained by dividing the observed sample GFP fluorescence by the sample  $OD_{600}$  (blanked against uninoculated LB) at each time point and then subtracting cell density-normalized culture autofluorescence from a concurrent untransformed BL21(DE3) control culture at the same time point as shown in Eqn. S1:

$$(S1) \text{ normalized fluorescence} = \left[ \frac{Fluorescence_{GFP,sample}}{\left( \frac{OD_{600,sample} - OD_{600,LB}}{b} \right)} \right] - \left[ \frac{Fluorescence_{GFP,control}}{\left( \frac{OD_{600,control} - OD_{600,LB}}{b} \right)} \right]$$

The optical density path length of 1 mL culture in one well of a 24-well plate,  $b$ , was determined according to Eqn. S2 using the absorbance of uninoculated LB media at 977 nm and 900 nm and the constant 1 cm absorbance of pure water at 977 nm,  $0.18 \text{ cm}^{-1}$ :

$$(S2) \ b = \frac{(A_{LB,977 \text{ nm}} - A_{LB,900 \text{ nm}})}{0.18 \text{ cm}^{-1}}$$

## Supporting Figures

### A) eNISTmAb

#### Full-length

|               |                  |                  |                  |                  |                  |                  |                  |                  |                  |                  |                  |                  |                  |
|---------------|------------------|------------------|------------------|------------------|------------------|------------------|------------------|------------------|------------------|------------------|------------------|------------------|------------------|
| DNA sequence: | AGC              | AAT              | ACC              | AAA              | GTG              | GAT              | AAA              | CGT              | GTT              | GAA              | CCG              | AAA              | AGC              |
| Amino acid:   | S <sub>210</sub> | N <sub>211</sub> | T <sub>212</sub> | K <sub>213</sub> | V <sub>214</sub> | D <sub>215</sub> | K <sub>216</sub> | R <sub>217</sub> | V <sub>218</sub> | E <sub>219</sub> | P <sub>220</sub> | K <sub>221</sub> | S <sub>222</sub> |

#### Truncated

|               |     |     |     |     |                |                |                |                |                |                |                |                |                |
|---------------|-----|-----|-----|-----|----------------|----------------|----------------|----------------|----------------|----------------|----------------|----------------|----------------|
| DNA sequence: | AGC | AAT | ACC | AAA | GTG            | GAT            | AAA            | CGT            | GTT            | GAA            | CCG            | AAA            | AGC            |
| Amino acid:   |     |     |     |     | M <sub>1</sub> | D <sub>2</sub> | K <sub>3</sub> | R <sub>4</sub> | V <sub>5</sub> | E <sub>6</sub> | P <sub>7</sub> | K <sub>8</sub> | S <sub>9</sub> |

### B) Adalimumab

#### Full-length

|               |                  |                  |                  |                  |                  |                  |                  |                  |                  |                  |                  |                  |                  |
|---------------|------------------|------------------|------------------|------------------|------------------|------------------|------------------|------------------|------------------|------------------|------------------|------------------|------------------|
| DNA sequence: | AGT              | AAC              | ACG              | AAA              | GTG              | GAT              | AAA              | AAA              | GTT              | GAA              | CCG              | AAA              | AGC              |
| Amino acid:   | S <sub>211</sub> | N <sub>212</sub> | T <sub>213</sub> | K <sub>214</sub> | V <sub>215</sub> | D <sub>216</sub> | K <sub>217</sub> | K <sub>218</sub> | V <sub>219</sub> | E <sub>220</sub> | P <sub>221</sub> | K <sub>222</sub> | S <sub>223</sub> |

#### Truncated

|               |     |     |     |     |                |                |                |                |                |                |                |                |                |
|---------------|-----|-----|-----|-----|----------------|----------------|----------------|----------------|----------------|----------------|----------------|----------------|----------------|
| DNA sequence: | AGT | AAC | ACG | AAA | GTG            | GAT            | AAA            | AAA            | GTT            | GAA            | CCG            | AAA            | AGC            |
| Amino acid:   |     |     |     |     | M <sub>1</sub> | D <sub>2</sub> | K <sub>3</sub> | K <sub>4</sub> | V <sub>5</sub> | E <sub>6</sub> | P <sub>7</sub> | K <sub>8</sub> | S <sub>9</sub> |

Supporting Figure S1. Region of internal initiation in the heavy chain of eNISTmAb (A) and adalimumab (B). The full-length mAb include a Val (highlighted in blue) encoded by GTG (highlighted in yellow), while the truncated heavy chain includes a Met (highlighted in blue) at position 1 encoded by GTG (highlighted in yellow).

A) DNA sequence

|            |                                                                                            |     |     |     |
|------------|--------------------------------------------------------------------------------------------|-----|-----|-----|
|            | -85                                                                                        | -40 | +1  |     |
| eNISTmAb   | GAGCAGCGTTGTTACCGTCCGAGCAGCAGCCTGGGCACCCAGACCTATATTGTAATGTTAATCATAAACCGAGCAATACCAAACCTGGA  |     |     | 90  |
| adalimumab | GAGTTCCGTGGTTACCGTCCCGTCATCGAGCCTGGGCACCCAAACGTACATCTGCAACGTTAATCACAACCGAGTAACACGAAACCTGGA |     |     | 90  |
|            | +27                                                                                        |     | +93 |     |
| eNISTmAb   | TAAACGTGTTGAACCGAAAAGCTGCCGATAAAACCCATACCTGTCCGCCTTGTCCGGCACCAGAACTGCTGGGTGGTCCGTCAGTTTT   |     |     | 178 |
| adalimumab | TAAAAAAGTTGAACCGAAAAGCTGTGACAAAACCTCACACATGCCACCGTGCCAGCACCTGAACTCCTGGGGGGACCGTCAGTCTTC    |     |     | 178 |

B) Amino acid sequence

|            |                                                              |     |     |    |
|------------|--------------------------------------------------------------|-----|-----|----|
|            | 186                                                          | 201 | 214 |    |
| eNISTmAb   | SSVVTVPSSSLGTQTYICNVNHKPSNTRVYDKRVEPKSCDKTHTCPPCPAPELLGGPSVF |     |     | 59 |
| adalimumab | SSVVTVPSSSLGTQTYICNVNHKPSNTRVYDKRVEPKSCDKTHTCPPCPAPELLGGPSVF |     |     | 59 |
|            | 187                                                          | 202 | 215 |    |

C) Percent identities between eNISTmAb and adalimumab

| Construct    | DNA percent identity | Amino acid percent identity |
|--------------|----------------------|-----------------------------|
| Full-length  | 78% (138/178)        | 98% (58/59)                 |
| <u>Short</u> | 84% (64/76)          | 95% (21/22)                 |

Supporting Figure S2. Alignments and identities of the DNA and amino acid sequences around the regions of internal initiation in the eNISTmAb and adalimumab.

A) DNA sequence alignment of the -85 to +93 region comprising the “full-length” constructs tested for internal initiation. Identical bases between the genes are highlighted in yellow, while mismatches are highlighted in gray. The internal initiation site is highlighted blue. The red bar covers the shortened region (-40, +27) identified that retains the same GFP fluorescence of the “full-length” eNISTmAb reporter construct. The DNA sequences shown were obtained by back-translation of the desired amino acid sequence followed by codon optimization for expression in *E. coli* by respective DNA synthesis vendors as described in “Methods”.

B) Amino acid sequence alignment encoded by the DNA shown in A with similar color scheme.

C) Summary of DNA and amino acid identities between eNISTmAb and adalimumab in the region considered for characterizing internal initiation.

Bgl II

```
agatctatcccgcgaaattaatacgactcactataggggagcagcgttggtaccggtccgagca  
gcagcctgggcacccagacctatatttgtaatgtaatacataaaccgagcaataccaaagtgga  
taaacgtgttgaaccgaaaagctgcgataaaaccataacctgtccgccttggtccggcaccggaa  
ctgctgggtgggtccgtcagtttttAGTAAAGGTGAAGAAGTTCACCGGTGTTGTTCCGATCC  
TGGTTGAACTGGATGGTGTGTTAACGGCCACAAATTCTCTGTTTCGTGGTGAAGGTGAAGGTGA  
TGCAACCAACGGTAAACTGACCCTGAAATTCATCTGCACTACCGGTAAACTGCCGGTTCATGG  
CCGACTCTGGTGACTACCCTGACCTATGGTGTTCAGTGTTTTTCTCGTTACCCGGATCACATGA  
AGCAGCATGATTTCTTCAAATCTGCAATGCCGGAAGGTTATGTACAGGAGCGCACCATTTCTTT  
CAAAGACGATGGCACCTACAAAACCCGTGCAGAGGTTAAATTTGAAGGTGATACTCTGGTGAAC  
CGTATTGAACTGAAAGGCATTGATTTCAAAGAGGACGGCAACATCCTGGGCCACAAACTGGAAT  
ATAACTTCAACTCCATAACGTTTACATCACCGCAGACAAACAGAAGAACGGTATCAAAGCTAA  
CTTCAAATTCGCCATAACGTTGAAGACGGTAGCGTACAGCTGGCGGACCACTACCAGCAGAAC  
ACTCCGATCGGTGATGGTCCGGTCTGCTGCCGGATAACCACTACCTGTCCACCCAGTCTAAAC  
TGTCCAAAGACCCGAACGAAAAGCGCGACCACATGGTGTCTGGAGTTCGTTACTGCAGCAGG  
TATCACGCACGGCATGGATGAACTCTACAAATAATAAagttggctgctgccaccgctgagcaat  
aactagcataacccttggggcctctaaacgggtccttgaggggttttttgctcgag
```

Xho I

Red – restriction enzyme sites

Yellow – T7 promoter

Purple – sequences around the GTG initiation in the eNISTmAb

Green – GFP

Gray – T7 terminator

Blue – GTG putative initiation site, mutated to GTA, GTC, GTT and ATG

Supporting Figure S3. DNA sequence of the GFP reporter construct.

The purple region of the reporter construct is derived from the eNISTmAb expression vector with GTG as the initiator codon. The sequence is nearly identical to the full-length (-85,+93) construct I shown in Figure 4 but the GTG codon is replaced with ATG. The construct was subcloned into a pET-21a vector at the restriction sites indicated in red.

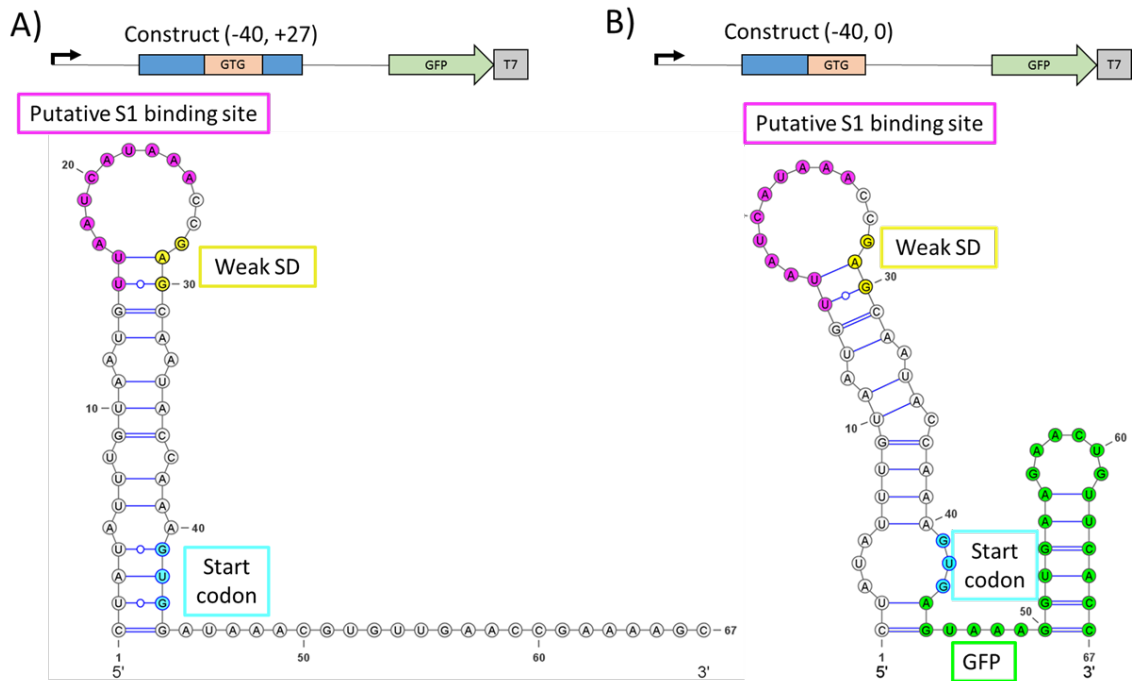

Supporting Figure S4. Predictions of secondary structure of the shortened (-40, +27) and the (-40, 0) sequences with GTG as the initiator codon.

A) Secondary structure prediction of the mRNA from shortened (-40, +27) sequence.

B) Secondary structure prediction of the mRNA from (-40, 0) sequence. Twenty-seven nucleotides of the GFP are also included and predicted to form a secondary structure.

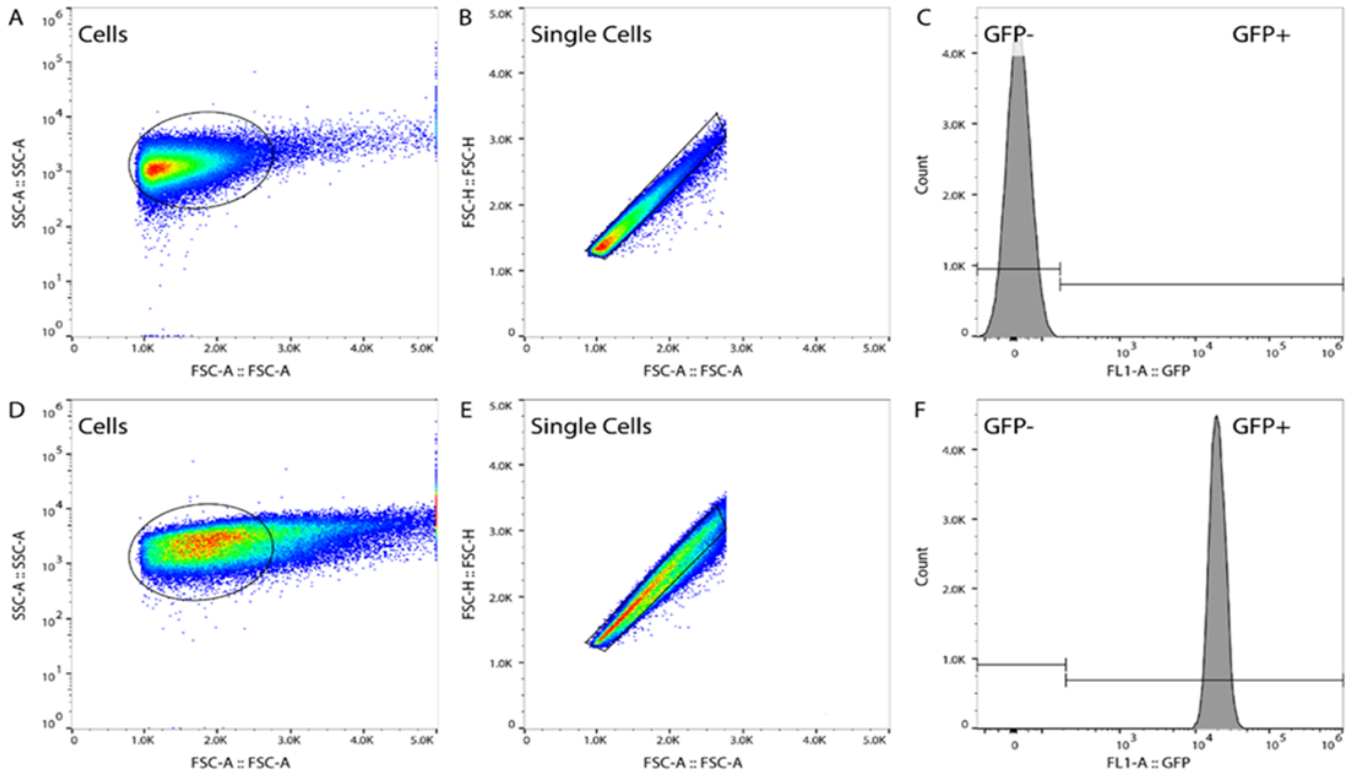

Supporting Figure S5. Flow cytometry gating strategy.

Gates applied to all samples are shown for A-C: untransformed BL21(DE3) and D-F: ATG start codon construct. Intensity axes in histograms (C, F) are shown with biexponential scaling.
